# Supplementary material
Source: PubMed Central journal article supplement (PMC4166499)
Supplement: NIHMS473683-supplement-Supplemental_data.pdf [file NIHMS473683-supplement-Supplemental_data.pdf]

**SUPPLEMENTAL TABLE 1. DEMOGRAPHIC AND CLINICAL CHARACTERISTICS OF FOUR COHORTS**

|                    | <b>Discovery Cohort</b> | <b>Replication Cohort 1</b> | <b>Replication Cohort 2</b> | <b>Replication Cohort 3</b> |
|--------------------|-------------------------|-----------------------------|-----------------------------|-----------------------------|
| Duration (wks)     | 12                      | 6                           | 6                           | 12                          |
| Total N            | 139                     | 73                          | 40                          | 92                          |
| Female N (%)       | 58 (41.7)               | 28 (38.4)                   | 18 (45.0)                   | 39 (42.4)                   |
| Male N (%)         | 81 (58.3)               | 45 (61.6)                   | 22 (55.0)                   | 53 (57.6)                   |
| Age (SD)           | 13.38 (3.75)            | 33.48 (8.33)                | 35.20 (11.33)               | 26.02 (5.17)                |
| Age range          | 4 - 19                  | 18 - 58                     | 18 - 62                     | 18-40                       |
| % Caucasian        | 77 (55.4)               | 51 (69.9)                   | 40 (100)                    | 92 (100)                    |
| % African American | 22 (23.0)               | 22 (30.1)                   | 0                           | 0                           |
| % other            | 30 (21.6)               | 0                           | 0                           | 0                           |
| Clozapine N (%)    | 0                       | 73 (100.0%)                 | 0                           | 0                           |
| Risperidone N (%)  | 84 (60.4)               | 0                           | 20 (50.0)                   | 0                           |
| Aripiprazole N (%) | 30 (21.6)               | 0                           | 15 (37.5)                   | 0                           |
| Quetiapine N (%)   | 25 (18.0)               | 0                           | 5 (12.5)                    | 25 (33.7)                   |
| Haloperidol N (%)  | 0                       | 0                           | 0                           | 31 (27.2)                   |
| Amisulpride N (%)  | 0                       | 0                           | 0                           | 21 (22.8)                   |
| Ziprasidone N (%)  | 0                       | 0                           | 0                           | 15 (16.3)                   |
| rs489693 CC N (%)  | 58 (41.7)               | 36 (49.3)                   | 17 (49.3)                   | 46(50.0)                    |
| rs489693 AC N (%)  | 66 (47.5)               | 26 (35.6)                   | 17 (35.6)                   | 39 (42.4)                   |
| rs489693 AA N (%)  | 15 (10.8)               | 11 (15.1)                   | 5 (15.1)                    | 7 (7.6)                     |

**Supplemental Table 2. Diagnoses of Discovery Cohort.**

| <i>Dx</i>                            | <i>n</i> | <i>%</i> |
|--------------------------------------|----------|----------|
| Asperger's Disorder                  | 3        | 2.2      |
| Autistic Disorder                    | 3        | 2.2      |
| Bipolar Disorder                     | 20       | 14.4     |
| Brief Psychotic Disorder             | 1        | 0.7      |
| Depressive Disorder NOS              | 5        | 3.6      |
| Major Depressive Disorder            | 21       | 15.1     |
| Mood Disorder NOS                    | 18       | 12.9     |
| Oppositional Defiant Disorder        | 20       | 14.4     |
| Pervasive Developmental Disorder NOS | 9        | 6.5      |
| Psychotic Disorder NOS               | 30       | 21.6     |
| Schizophrenia                        | 7        | 5.0      |
| Schizophreniform Disorder            | 1        | 0.7      |
| Tourette's Disorder                  | 1        | 0.7      |

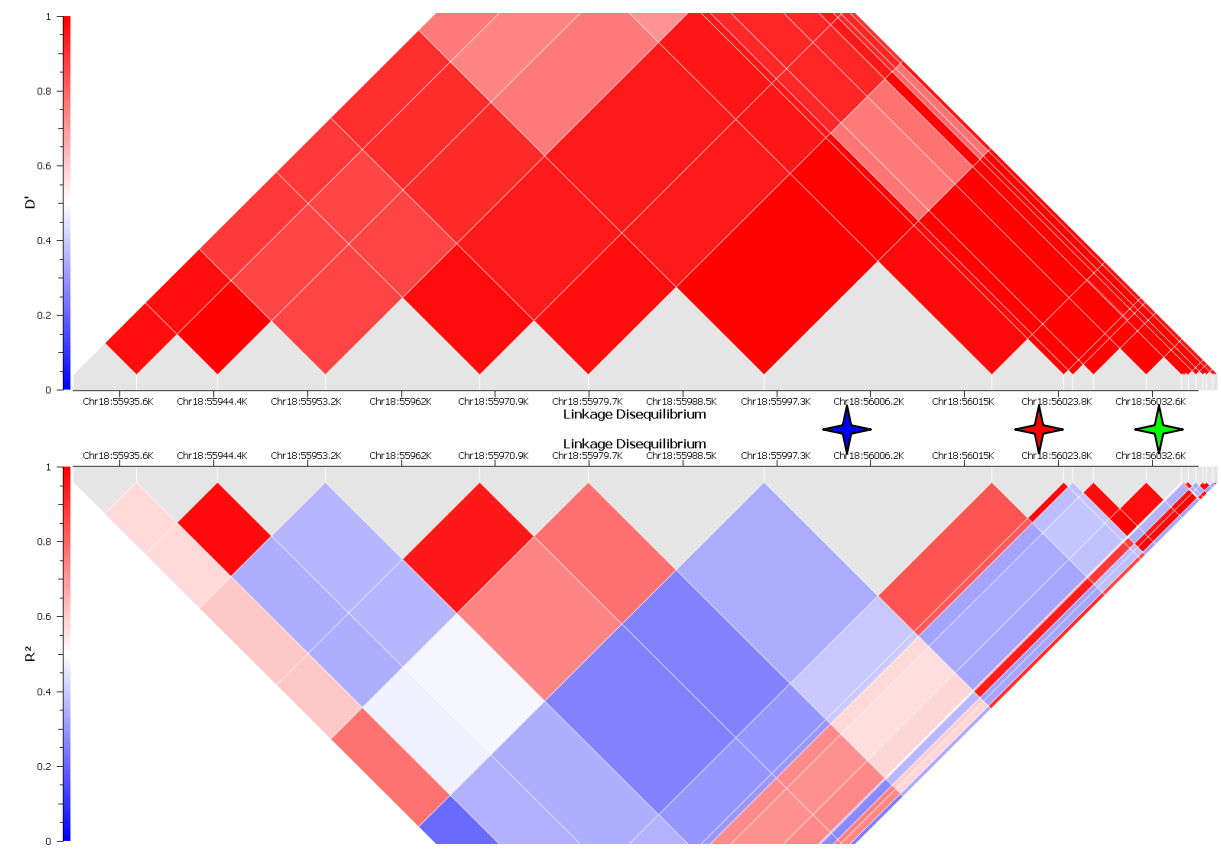

### Supplemental Figure 1. Linkage Disequilibrium Plot.

Linkage disequilibrium for the SNPs listed in Table 1A. Top half displays  $D'$  values, which are at or near 1 across the region, demonstrating that alleles tend to travel upon the same haplotypes. Bottom half displays  $r^2$  values, which vary based on differing minor allele frequencies as listed in Table 2. Green star indicates location of best-replicated SNP in the present study (rs489693); red star indicates location of top SNP emerging from GWAS in the discovery cohort (rs1942876); blue star indicates location of top SNP emerging from large-scale GWAS of BMI in the general population (rs17782313; Loos et al. 2008)

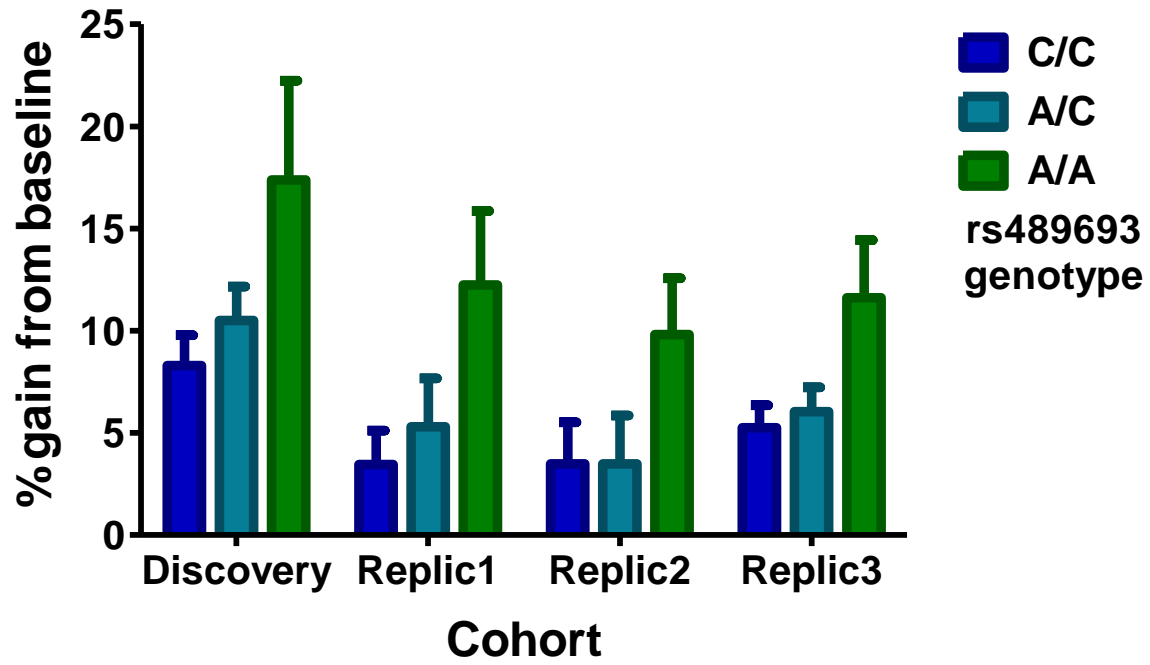

Supplemental Figure 2. rs489693 genotype and percent change in weight from baseline for four cohorts.
